# Supplementary material for: Immobilization of amino acid ionic liquids into nanoporous microspheres as robust sorbents for CO2 capture
Source: Royal Society of Chemistry journal article supplement (doi:10.1039/c3ta00768e), 2013-01-01
Supplement: c3ta00768e.pdf [file c3ta00768e.pdf]

## Electronic Supplementary Information (ESI)

# Immobilize amino acid ionic liquid into nanoporous microspheres as robust sorbents for CO<sub>2</sub> capture

Xianfeng Wang,<sup>ab</sup> Novruz G. Akhmedov,<sup>c</sup> Yuhua Duan,<sup>a</sup> David Luebke,<sup>a</sup> Bingyun Li<sup>abd\*</sup>

<sup>a</sup>National Energy Technology Laboratory-Regional University Alliance (NETL-RUA), United States

<sup>b</sup>Department of Orthopaedics, School of Medicine, West Virginia University, Morgantown, WV 26506, United States. E-mail: bili@hsc.wvu.edu (B. Li)

<sup>c</sup>Department of Chemistry, West Virginia University, Morgantown, WV 26506, United States

<sup>d</sup>WV Nano Initiative, Morgantown, WV 26506, United States

## Experimental details

### Materials

1-ethyl-3-methylimidazolium bromide ([EMIM][Br], ≥97.0%), glycine (Gly), alanine (Ala), arginine (Arg), anion exchange resin (Amberlite® IRA400 hydroxide), and ethanol were purchased from Sigma Aldrich Co. (St. Louis, MO) Polymethylmethacrylate (PMMA) microparticles were purchased from Supelco Co. (Bellefonte, PA) with the following manufacturer specifications: effective particle size 0.5 mm; pore volume 1.2 ml/g; specific

surface area 470 m<sup>2</sup>/g; and density 0.29 g/ml. N<sub>2</sub> and CO<sub>2</sub> of high purity were used for thermogravimetric analysis (TGA).

### **Synthesis of [EMIM][AA]**

The [EMIM][AA] was prepared using a neutralization method reported previously.<sup>1</sup> Briefly, [EMIM][Br] was dissolved in deionized water to prepare an aqueous solution and passed through the anion exchange resin-Amberlite® IRA400 (OH-type) to prepare the [EMIM][OH] solution. Then, the [EMIM][OH] solution was added in slight excess of an equimolar amino acid solution while stirring at room temperature for 24 h. After evaporation of water and then drying at 50°C in vacuum for 12 h, a crude product containing the desired IL and unreacted amino acid was obtained. Ethanol was then added to recrystallize and remove solvents. The mixture was centrifuged at 3750 rpm for 15 min to remove the insoluble AAs. The ethanol in the resultant solution was removed by rotating evaporation. After drying at 80°C under vacuum for 12 h, [EMIM][AA] was obtained at an overall yield of ~75%.

### **Preparation of [EMIM][AA]-impregnated PMMA sorbents**

Immobilization of [EMIM][AA] into porous PMMA support was carried out with the aid of ethanol solvent according to a well-studied wet impregnation-vaporization method.<sup>2-5</sup> In brief, [EMIM][AA] was dissolved in ethanol at a concentration of 50 mg/mL under a rotary evaporator (RV 10 basic plus D, Wilmington, NC) using a stirring rate of 100 rpm. After 30 min, PMMA microparticles were added. The suspension was continuously stirred for about 30 min under vacuum and subsequently dried at 50°C for 6 h. [EMIM][AA]-PMMA sorbents with various

loadings (i.e. 0, 20, 40, 50, 60, 80, 100 wt.%) of immobilized [EMIM][AA] to the PMMA support were prepared.

### **Characterization**

The thermal stability of [EMIM][AA] was performed on an SDT Q600 (V20.9 Build 20) instrument (Artisan Technology Group, Champaign, IL) under N<sub>2</sub> atmosphere with a heating rate of 10 °C/min. The chemical structures of [EMIM][AA]-impregnated PMMA sorbents before adsorption and after five adsorption/desorption tests were characterized using FTIR (FTS 7000 with UMA 600 microscope). The morphology of PMMA microparticles was observed using scanning electron microscopy (SEM) (Hitachi S-4700, Tokyo, Japan). PMMA microparticles were cut into half using a thin, sharp blade under an optical microscope. Samples were glued onto stainless steel supports sputtered with gold, and examined with SEM.

### **CO<sub>2</sub> sorption and desorption**

The CO<sub>2</sub> capture performance of [EMIM][AA]-impregnated PMMA sorbents was determined using TGA. Approximately 30 mg of PMMA based sorbent was placed in the TGA microbalance quartz sample cell and heated to 105°C in N<sub>2</sub> atmosphere at a flow of 200 ml/min for about 60 min. The temperature was then adjusted to 40°C (or 25, 60, 80°C, for determining the effect of temperature on CO<sub>2</sub> capture performance) and pure dry CO<sub>2</sub> was introduced at a flow of 200 ml/min until no obvious weight gain was observed. The desorption progress was conducted by introducing pure N<sub>2</sub> into the sample cell at 105°C for 60 min. The weight change in mg of the PMMA sorbents was recorded and the weight change in percentage was defined as the ratio of the amount of the gas adsorbed or desorbed over the total amount of CO<sub>2</sub> adsorbed.

Adsorption capacity in mmol CO<sub>2</sub>/(g sorbent) was calculated from the weight change of the samples during the adsorption/desorption cycles.

The activation energy ( $E_a$ ) of CO<sub>2</sub> adsorption was calculated from Fig. 4 based on the Arrhenius law. The following equation was used:

$$\ln(C_1/C_2) = \ln(k_1/k_2) = E_a/R(1/T_1 - 1/T_2)$$

Where  $C_1$  and  $C_2$  were the capacity at two different temperatures ( $T_1$  and  $T_2$ ) and  $R=8.314$  J/mol·K. The calculated  $E_a$  was 6.8 kJ/mol.

**Table S1.** CO<sub>2</sub> sorption capacity ( $C$ ) of the three sorbents with [EMIM][AA] loading of 50 wt.%.

| Sample           | $C_{theo}$ (mol/mol) | $C_{exp}$ (mol/mol) | $C_{exp}$ (mmol/g IL) | $C_{exp}$ (mmol/g sorbents) |
|------------------|----------------------|---------------------|-----------------------|-----------------------------|
| [EMIM][Gly]-PMMA | 0.5                  | 0.49                | 3.06                  | 1.53                        |
| [EMIM][Ala]-PMMA | 0.5                  | 0.45                | 2.76                  | 1.38                        |
| [EMIM][Arg]-PMMA | 1.5                  | 0.52                | 2.02                  | 1.01                        |

$C_{theo}$ : Theoretical CO<sub>2</sub> sorption capacity;  $C_{exp}$ : Experimental CO<sub>2</sub> sorption capacity

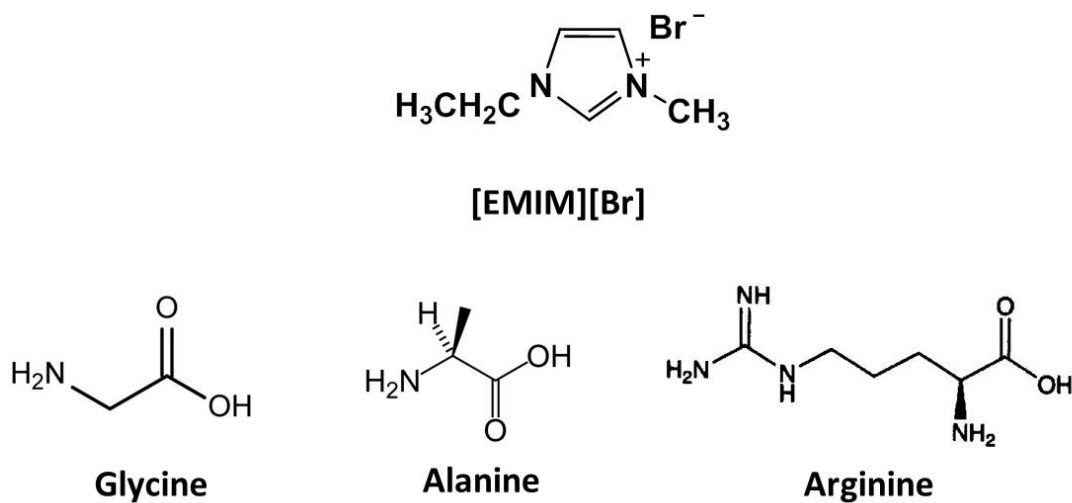

**Scheme S1.** Structure of [EMIM][Br], glycine, alanine, and arginine.

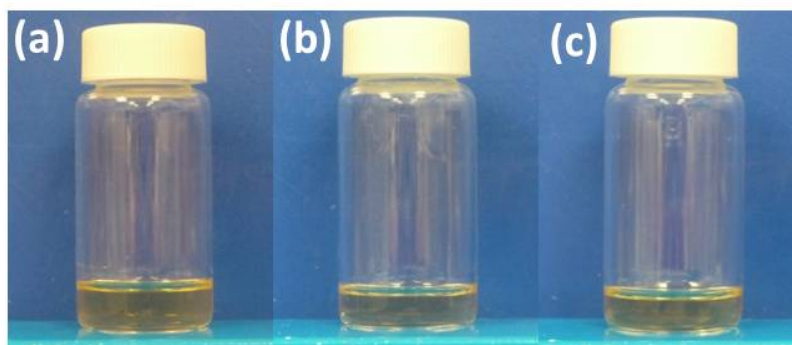

**Fig. S1.** Prepared amino acid ionic liquids: (a) [EMIM][Gly], (b) [EMIM][Ala], and (c) [EMIM][Arg].

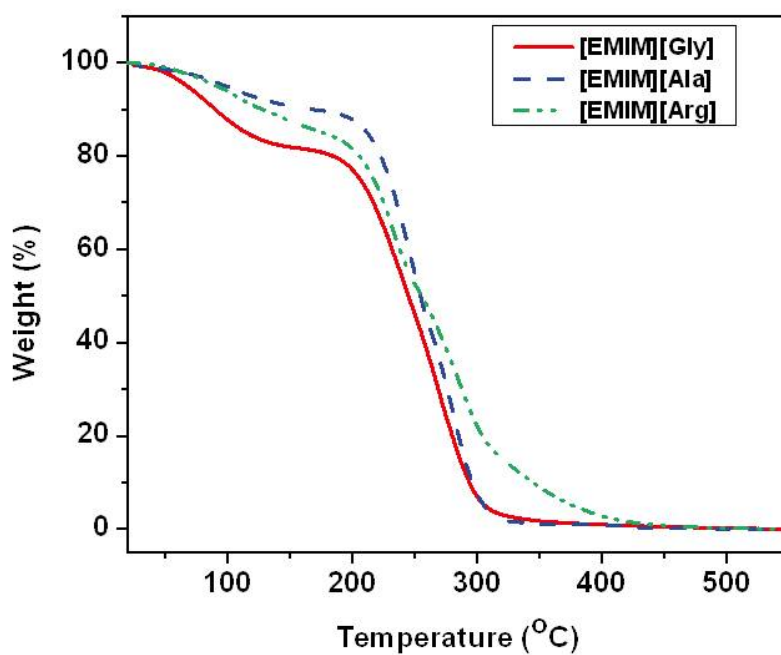

**Fig. S2.** Thermogravimetric analysis traces of as-prepared [EMIM][AA] ( $N_2$  atmosphere, heating rate of  $20^\circ C/min$ ).

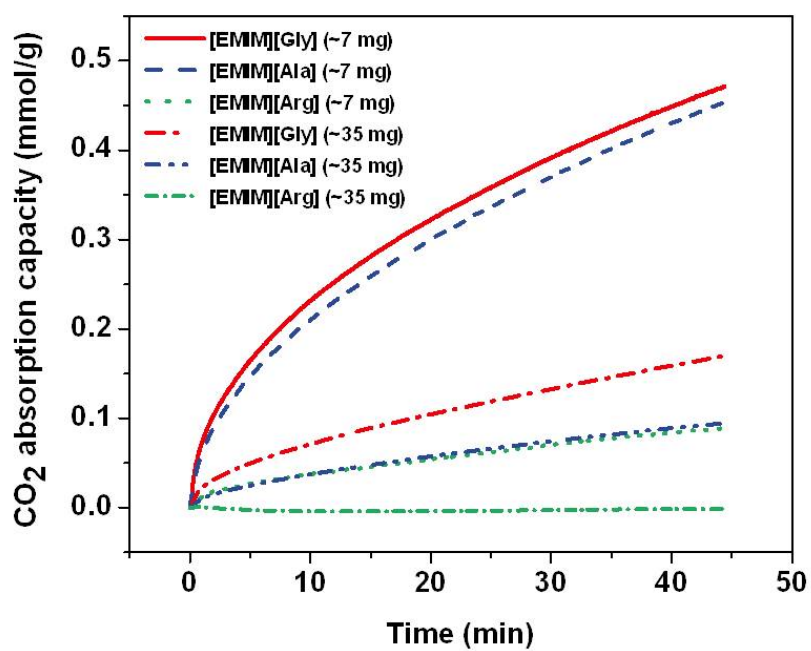

**Fig. S3.** CO<sub>2</sub> absorption of [EMIM][AA] (i.e. [EMIM][Gly], [EMIM][Ala] and [EMIM][Arg]) solvents at 40°C.

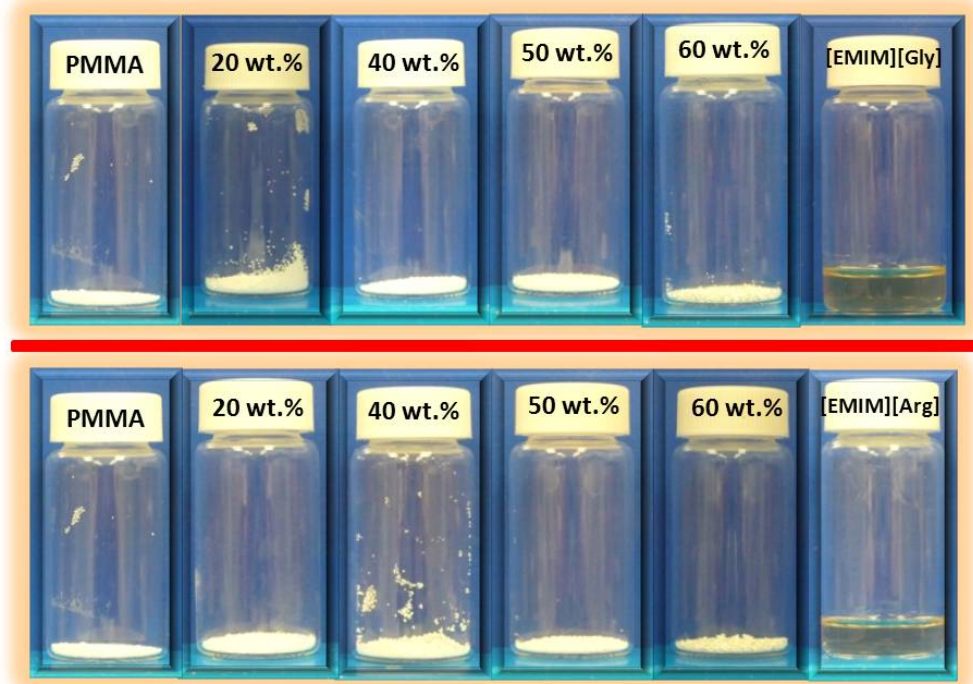

**Fig. S4.** Photograph images of [EMIM][AA] sorbents with various AAIL loadings. Top: [EMIM][Gly]; Bottom: [EMIM][Ala].

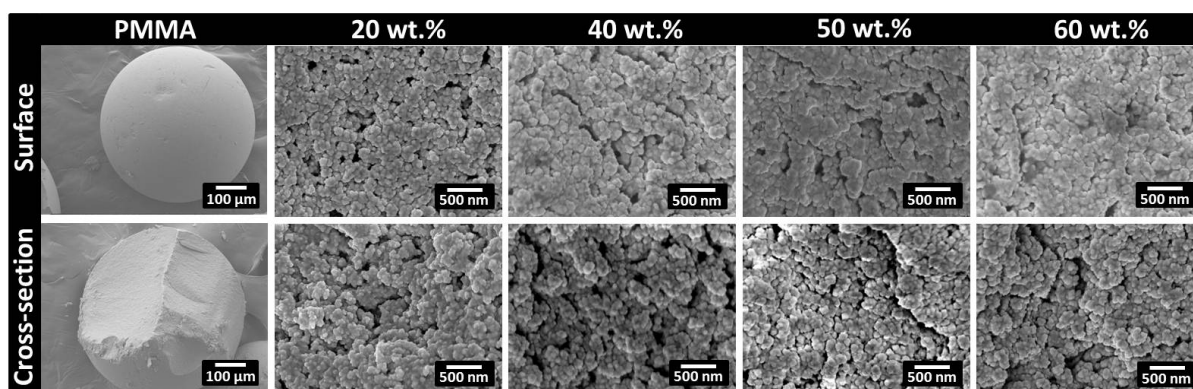

**Fig. S5.** SEM images of PMMA particles and as-prepared [EMIM][Gly]-PMMA sorbents with different [EMIM][Gly] loadings (20, 40, 50, and 60 wt.%). Top: Surface structures; Bottom: Cross-section structures.



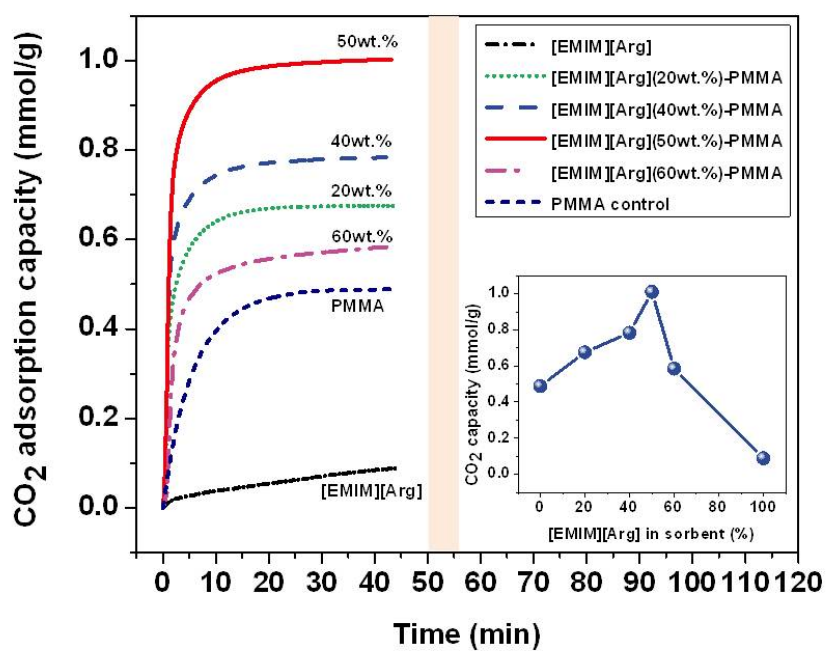

**Fig. S6.** CO<sub>2</sub> adsorption of [EMIM][Arg]-PMMA sorbent with various [EMIM][Arg] loadings (0 or PMMA, 20, 40, 60, and 100 wt.% or [EMIM][Arg]) at 40°C. Inset shows the CO<sub>2</sub> capacity vs. [EMIM][Arg] loading in sorbents.

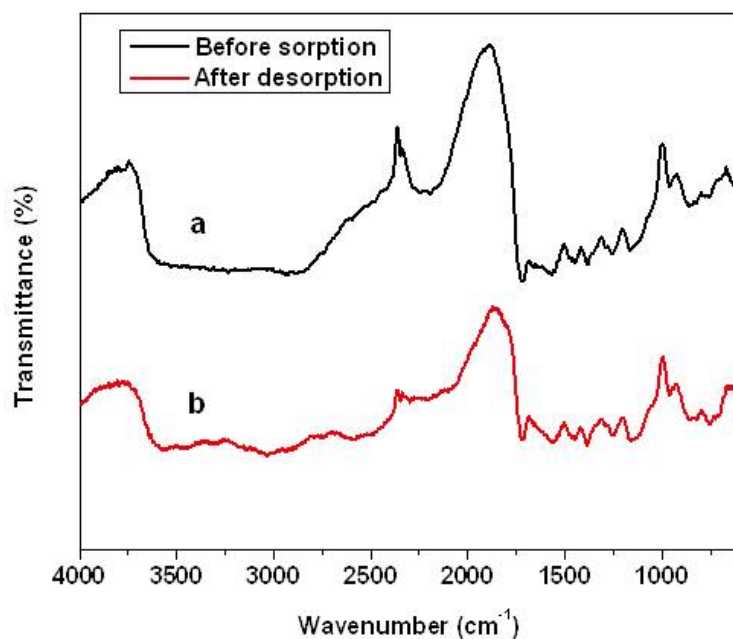

**Fig. S7.** FTIR spectrum of [EMIM][Gly]-PMMA sorbent (a) before CO<sub>2</sub> adsorption and (b) after CO<sub>2</sub> desorption.

## References

- 1 K. Fukumoto, M. Yoshizawa and H. Ohno, *J. Am. Chem. Soc.*, 2005, **127**, 2398-2399.
- 2 M. Gray, J. Hoffman, D. Hreha, D. Fauth, S. Hedges, K. Champagne and H. Pennline, *Energy Fuels*, 2009, **23**, 4840-4844.
- 3 B. Jiang, V. Kish, D. J. Fauth, M. L. Gray, H. W. Pennline and B. Li, *Int. J. Greenh. Gas Control*, 2011, **5**, 1170-1175.
- 4 Z. Zhang, L. Wu, J. Dong, B. G. Li and S. Zhu, *Ind. Eng. Chem. Res.*, 2009, **48**, 2142-2148.
- 5 J. Ren, L. B. Wu and B. G. Li, *Ind. Eng. Chem. Res.*, 2012, **51**, 7901-7909.
